# Supplementary material
Source: HighWire-hosted journal article supplement (https://jnm.snmjournals.org/highwire/filestream/99544/field_highwire_adjunct_files/0/244640_Supplemental_Data.pdf)
Supplement: 244640_Supplemental_Data.pdf [file 244640_Supplemental_Data.pdf]

**Supplemental Figure 1.** Venn diagram of the visualized metastases on ceCT, <sup>99m</sup>Tc bone scintigraphy (BS), <sup>18</sup>F-fluorodeoxyglucose-PET (FDG-PET).

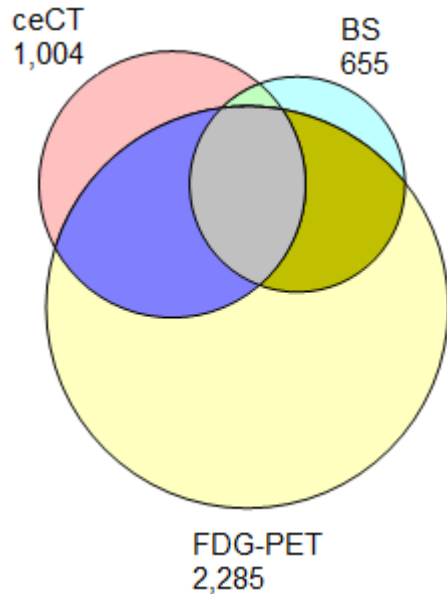

**Supplemental Table 1.** Agreement between ceCT, BS and FDG-PET in detecting suspected bone lesions.

|                                   | Per patient <sup>1</sup> | Per lesion <sup>2</sup>  |
|-----------------------------------|--------------------------|--------------------------|
|                                   | Kappa (95%CI)            | Multilevel Kappa (95%CI) |
| ceCT versus BS                    | 0.67 (0.52;0.82)         | 0.11 (0.02;0.20)         |
| ceCT versus FDG-PET               | 0.67 (0.52;0.82)         | -0.14 (-0.23;-0.04)      |
| BS versus FDG-PET                 | 0.54 (0.37;0.71)         | -0.05 (-0.09;0.00)       |
| Across modalities (Fleiss' Kappa) | 0.62 (0.51;0.73)         | -0.17 (-0.21;-0.13)      |

<sup>1</sup>102 patients; <sup>2</sup>3473 unequivocal bone lesions in 84 patients

Abbr. ceCT = contrast enhanced computed tomography; BS = <sup>99m</sup>Tc-DP whole body bone scintigraphy; FDG-PET = <sup>18</sup>F-fluorodeoxyglucose-PET; CI = confidence interval

**Supplemental Table 2.** Table reflecting the cases with clinically relevant change of management by FDG-PET plus ceCT compared to BS plus ceCT (patient 1-16) and change of management by BS plus ceCT compared to FDG-PET plus ceCT (patient 17).

| Patient | Number of Bone lesions                                                              | Setting                  | Systemic therapy         | Bisphosphonate | Radiotherapy        | Additional FDG-PET (1) or BS (2) needed |
|---------|-------------------------------------------------------------------------------------|--------------------------|--------------------------|----------------|---------------------|-----------------------------------------|
| 1       | 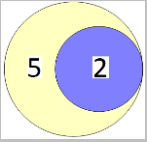   | curative<br>non-curative | unknown<br>chemo         | no<br>yes      | =                   | 1                                       |
| 2       |    | =                        | =                        | no<br>yes      | =                   | 0                                       |
| 3       |    | unknown<br>curative      | unknown<br>anti-hormonal | =              | unknown<br>curative | 1                                       |
| 4       |   | curative<br>non-curative | =                        | no<br>yes      | curative<br>no      | 1                                       |
| 5       | 0<br>(BS: 10 equivocal lesions)                                                     | unknown<br>non-curative  | unknown<br>chemo         | =              | =                   | 1                                       |
| 6       |  | =                        | =                        | no<br>yes      | no<br>curative      | 1                                       |
| 7       |  | curative<br>non-curative | =                        | =              | No<br>non-curative  | 1                                       |
| 8       |  | unknown<br>curative      | unknown<br>anti-hormonal | unknown<br>yes | unknown<br>curative | 1                                       |
| 9       |  | =                        | =                        | no<br>yes      | =                   | 0                                       |

|    |  |                          |                          |           |                    |   |
|----|--|--------------------------|--------------------------|-----------|--------------------|---|
| 10 |  | curative<br>non-curative | no<br>anti-hormonal      | no<br>yes | curative<br>no     | 0 |
| 11 |  | curative<br>non-curative | unknown<br>chemotherapy  | no<br>yes | =                  | 1 |
| 12 |  | =                        | =                        | no<br>yes | =                  | 1 |
| 13 |  | =                        | =                        | no<br>yes | =                  | 1 |
| 14 |  | unknown<br>non-curative  | =                        | =         | curative<br>no     | 1 |
| 15 |  | =                        | =                        | =         | no<br>non-curative | 0 |
| 16 |  | =                        | =                        | no<br>yes | =                  | 0 |
| 17 |  | Unknown<br>non-curative  | Unknown<br>anti-hormonal | =         | =                  | 2 |

Venn diagram: the numbers in the circles reflect the number of bone lesions per modality, ceCT is red, BS is baby blue, FDG-PET is yellow. Overlap between all 3 modalities is grey; ceCT and FDG-PET is dark blue; BS and FDG-PET is green. '=' means equal management recommendation between BS plus ceCT and FDG-PET plus ceCT; in case of discordance, the recommendations based on BS plus ceCT are blue and those based on FDG-PET plus ceCT are red.  
 Abbr. BS = <sup>99m</sup>Tc-DP whole body bone scintigraphy; FDG-PET = <sup>18</sup>F-fluorodeoxyglucose-PET.
